# Supplementary material for: Effects of Sleep Deprivation on Blood Glucose, Food Cravings, and Affect in a Non-Diabetic: An N-of-1 Randomized Pilot Study
Source: PubMed Central journal article supplement (PMC7151045; doi:10.3390/healthcare8010006), 2019-12-25
Supplement: healthcare-08-00006-s001.pdf [file healthcare-08-00006-s001.pdf]

Supplementary Materials

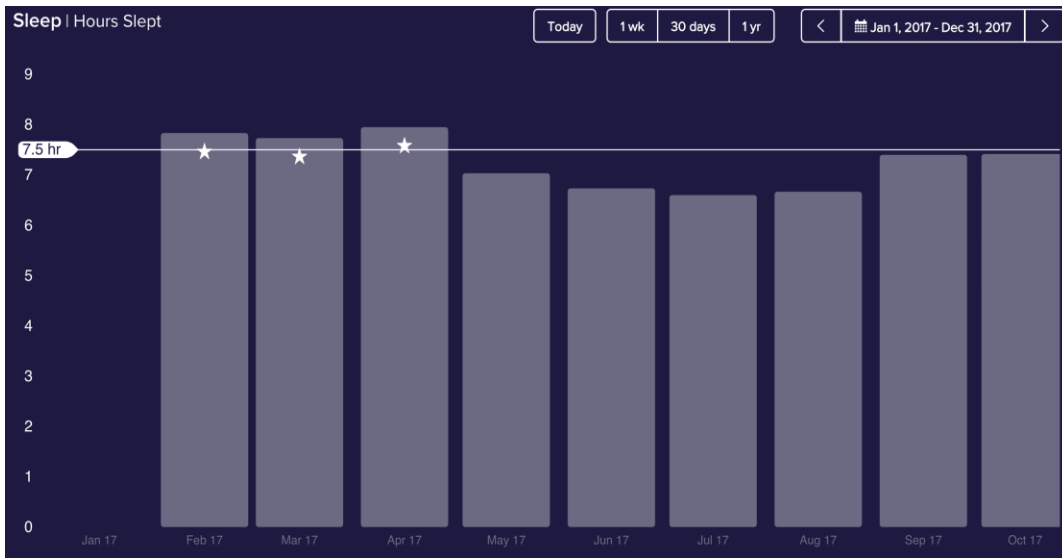

**Figure S1.** Participant KW’s monthly Fitbit sleep duration data (i.e., total sleep time) for February through October 2017.

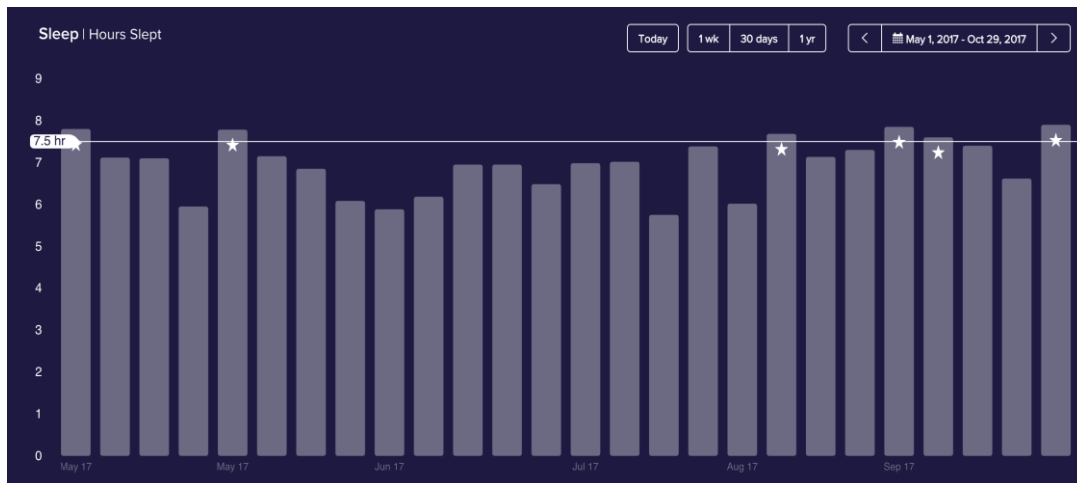

**Figure S2.** Participant KW’s weekly Fitbit sleep duration data (i.e., total sleep time) for April through September 2017. (Note: The first “May 17” instance is an incorrect display artifact produced by the Fitbit app, and should read “Apr 17”).

## Mixed-Effects Model Numerical Results: Effect Sub-period Analysis

Linear mixed model fit by REML ['lmerMod']

Formula: log\_bg.level ~ treatment \* withinstudyday\_timept + treatment \*  
withinstudyday\_timept2 + treatment \* withinstudyday\_timept3 +  
treatment \* withinstudyday\_timept4 + treatment \* withinstudyday\_timept5 +  
treatment \* withinstudyday\_timept6 + (withinstudyday\_timept | period)  
Data: tbl\_bglong\_h1

REML criterion at convergence: 140.1

Scaled residuals:

| Min     | 1Q      | Median  | 3Q     | Max    |
|---------|---------|---------|--------|--------|
| -2.2630 | -0.6285 | -0.0594 | 0.5258 | 4.5156 |

Random effects:

| Groups   | Name                  | Variance  | Std.Dev. | Corr  |
|----------|-----------------------|-----------|----------|-------|
| period   | (Intercept)           | 2.757e-03 | 0.052509 |       |
|          | withinstudyday_timept | 6.748e-05 | 0.008215 | -0.57 |
| Residual |                       | 5.057e-02 | 0.224874 |       |

Number of obs: 845, groups: period, 8

Fixed effects:

|                                                  | Estimate   | Std. Error | t value |
|--------------------------------------------------|------------|------------|---------|
| (Intercept)                                      | 4.108e+00  | 7.547e-02  | 54.431  |
| treatment1. A (Sleep-Dep)                        | 1.011e-01  | 1.063e-01  | 0.950   |
| withinstudyday_timept                            | 2.113e-01  | 8.315e-02  | 2.541   |
| withinstudyday_timept2                           | -6.113e-02 | 3.108e-02  | -1.967  |
| withinstudyday_timept3                           | 7.796e-03  | 4.987e-03  | 1.563   |
| withinstudyday_timept4                           | -4.907e-04 | 3.858e-04  | -1.272  |
| withinstudyday_timept5                           | 1.535e-05  | 1.420e-05  | 1.080   |
| withinstudyday_timept6                           | -1.932e-07 | 1.997e-07  | -0.968  |
| treatment1. A (Sleep-Dep):withinstudyday_timept  | -3.353e-01 | 1.171e-01  | -2.864  |
| treatment1. A (Sleep-Dep):withinstudyday_timept2 | 1.630e-01  | 4.361e-02  | 3.738   |
| treatment1. A (Sleep-Dep):withinstudyday_timept3 | -2.914e-02 | 6.975e-03  | -4.177  |
| treatment1. A (Sleep-Dep):withinstudyday_timept4 | 2.354e-03  | 5.384e-04  | 4.372   |
| treatment1. A (Sleep-Dep):withinstudyday_timept5 | -8.771e-05 | 1.979e-05  | -4.432  |
| treatment1. A (Sleep-Dep):withinstudyday_timept6 | 1.225e-06  | 2.778e-07  | 4.410   |

Correlation matrix not shown by default, as p = 14 > 12.

Use print(x, correlation=TRUE) or  
vcov(x) if you need it

fit warnings:

Some predictor variables are on very different scales: consider rescaling

convergence code: 0

Model failed to converge with max|grad| = 0.0905077 (tol = 0.002, component 1)

|                                                  | 2.5 %         | 97.5 %        |
|--------------------------------------------------|---------------|---------------|
| .sig01                                           | 0.000000e+00  | 9.571942e-02  |
| .sig02                                           | -1.000000e+00 | 1.000000e+00  |
| .sig03                                           | 3.754423e-03  | 1.314100e-02  |
| .sigma                                           | 2.132119e-01  | 2.347651e-01  |
| (Intercept)                                      | 3.964133e+00  | 4.251895e+00  |
| treatment1. A (Sleep-Dep)                        | -1.020303e-01 | 3.033915e-01  |
| withinstudyday_timept                            | 4.936739e-02  | 3.736656e-01  |
| withinstudyday_timept2                           | -1.218133e-01 | -5.655432e-04 |
| withinstudyday_timept3                           | -1.928377e-03 | 1.752756e-02  |
| withinstudyday_timept4                           | -1.243079e-03 | 2.620329e-04  |
| withinstudyday_timept5                           | -1.237936e-05 | 4.303775e-05  |
| withinstudyday_timept6                           | -5.823552e-07 | 1.965750e-07  |
| treatment1. A (Sleep-Dep):withinstudyday_timept  | -5.632297e-01 | -1.066787e-01 |
| treatment1. A (Sleep-Dep):withinstudyday_timept2 | 7.789274e-02  | 2.480090e-01  |
| treatment1. A (Sleep-Dep):withinstudyday_timept3 | -4.273291e-02 | -1.552311e-02 |
| treatment1. A (Sleep-Dep):withinstudyday_timept4 | 1.303030e-03  | 3.403138e-03  |
| treatment1. A (Sleep-Dep):withinstudyday_timept5 | -1.262644e-04 | -4.906767e-05 |
| treatment1. A (Sleep-Dep):withinstudyday_timept6 | 6.825085e-07  | 1.766118e-06  |

## Mixed-Effects Model Numerical Results: Entire-Period Analysis

Linear mixed model fit by REML ['lmerMod']

```
Formula: log_bg.level ~ treatment * withinperiod_timept + treatment *  
  withinperiod_timept2 + treatment * withinperiod_timept3 +  
  treatment * withinperiod_timept4 + treatment * withinperiod_timept5 +  
  treatment * withinperiod_timept6 + treatment * withinperiod_timept7 +  
  withinperiod_timept8 + (1 | period) treatment *  
Data: tbl_bglong
```

REML criterion at convergence: -22.5

Scaled residuals:

| Min     | 1Q      | Median  | 3Q     | Max    |
|---------|---------|---------|--------|--------|
| -3.3228 | -0.6053 | -0.1579 | 0.4255 | 6.2283 |

Random effects:

| Groups   | Name        | Variance | Std.Dev. |
|----------|-------------|----------|----------|
| period   | (Intercept) | 0.005615 | 0.07493  |
| Residual |             | 0.046244 | 0.21504  |

Number of obs: 2541, groups: period, 8

Fixed effects:

|                                                | Estimate   | Std. Error | t value |
|------------------------------------------------|------------|------------|---------|
| (Intercept)                                    | 4.240e+00  | 6.413e-02  | 66.117  |
| treatment1. A (Sleep-Dep)                      | 2.267e-02  | 9.074e-02  | 0.250   |
| withinperiod_timept                            | 3.106e-02  | 3.357e-02  | 0.925   |
| withinperiod_timept2                           | -4.005e-03 | 7.011e-03  | -0.571  |
| withinperiod_timept3                           | 4.310e-04  | 6.640e-04  | 0.649   |
| withinperiod_timept4                           | -2.703e-05 | 3.330e-05  | -0.812  |
| withinperiod_timept5                           | 9.069e-07  | 9.436e-07  | 0.961   |
| withinperiod_timept6                           | -1.648e-08 | 1.517e-08  | -1.087  |
| withinperiod_timept7                           | 1.542e-10  | 1.288e-10  | 1.197   |
| withinperiod_timept8                           | -5.842e-13 | 4.490e-13  | -1.301  |
| treatment1. A (Sleep-Dep):withinperiod_timept  | -8.465e-02 | 4.737e-02  | -1.787  |
| treatment1. A (Sleep-Dep):withinperiod_timept2 | 2.923e-02  | 9.897e-03  | 2.953   |
| treatment1. A (Sleep-Dep):withinperiod_timept3 | -3.725e-03 | 9.370e-04  | -3.975  |
| treatment1. A (Sleep-Dep):withinperiod_timept4 | 2.221e-04  | 4.696e-05  | 4.730   |
| treatment1. A (Sleep-Dep):withinperiod_timept5 | -6.980e-06 | 1.329e-06  | -5.250  |
| treatment1. A (Sleep-Dep):withinperiod_timept6 | 1.193e-07  | 2.135e-08  | 5.591   |
| treatment1. A (Sleep-Dep):withinperiod_timept7 | -1.052e-09 | 1.811e-10  | -5.805  |
| treatment1. A (Sleep-Dep):withinperiod_timept8 | 3.739e-12  | 6.306e-13  | 5.930   |

Correlation matrix not shown by default, as p = 18 > 12.

Use print(x, correlation=TRUE) or  
vcov(x) if you need it

fit warnings:

Some predictor variables are on very different scales: consider rescaling

|                                                | 2.5 %         | 97.5 %        |
|------------------------------------------------|---------------|---------------|
| .sig01                                         | 4.132347e-02  | 1.172637e-01  |
| .sigma                                         | 2.085950e-01  | 2.204065e-01  |
| (Intercept)                                    | 4.118962e+00  | 4.361331e+00  |
| treatment1. A (Sleep-Dep)                      | -1.488223e-01 | 1.941211e-01  |
| withinperiod_timept                            | -3.453895e-02 | 9.670494e-02  |
| withinperiod_timept2                           | -1.771505e-02 | 9.691361e-03  |
| withinperiod_timept3                           | -8.658398e-04 | 1.729576e-03  |
| withinperiod_timept4                           | -9.215576e-05 | 3.800145e-05  |
| withinperiod_timept5                           | -9.358435e-07 | 2.752697e-06  |
| withinperiod_timept6                           | -4.614979e-08 | 1.313833e-08  |
| withinperiod_timept7                           | -9.738768e-11 | 4.062645e-10  |
| withinperiod_timept8                           | -1.462718e-12 | 2.926917e-13  |
| treatment1. A (Sleep-Dep):withinperiod_timept  | -1.772204e-01 | 7.957646e-03  |
| treatment1. A (Sleep-Dep):withinperiod_timept2 | 9.882921e-03  | 4.856967e-02  |
| treatment1. A (Sleep-Dep):withinperiod_timept3 | -5.556351e-03 | -1.893450e-03 |
| treatment1. A (Sleep-Dep):withinperiod_timept4 | 1.303798e-04  | 3.139358e-04  |
| treatment1. A (Sleep-Dep):withinperiod_timept5 | -9.578899e-06 | -4.382116e-06 |
| treatment1. A (Sleep-Dep):withinperiod_timept6 | 7.764496e-08  | 1.610876e-07  |
| treatment1. A (Sleep-Dep):withinperiod_timept7 | -1.405709e-09 | -6.976359e-10 |
| treatment1. A (Sleep-Dep):withinperiod_timept8 | 2.507320e-12  | 4.972509e-12  |
